# Supplementary material for: Brushed creation of liquid marbles
Source: PeerJ journal article supplement (doi:10.7717/peerj-matsci.24), 2022-10-12
Supplement: Data.xlsx [file Data.xlsx]

## Sheet: Fig.4(a)
	Talc	Graphite
Separation (nm)	FvDW (nN)	FvDW (nN)
1
2	32.811	32.4134
3	14.5824	14.4052
4	8.2024	8.10255
5	5.24942	5.18537
6	3.64535	3.60077
7	2.67815	2.64533
8	2.05042	2.02523
9	1.62005	1.6001
10	1.31221	1.29602
11	1.08445	1.07104
12	0.911215	0.899923
13	0.776403	0.76676
14	0.669435	0.661102
15	0.583139	0.575864
16	0.512513	0.506105
17	0.453981	0.448292
18	0.404931	0.399846
19	0.36342	0.358846
20	0.327979	0.323843
21	0.29748	0.29372
22	0.271045	0.267612
23	0.247983	0.244835
24	0.227743	0.224846
25	0.209883	0.207208
26	0.194045	0.191565
27	0.179933	0.177629
28	0.167307	0.16516
29	0.155964	0.153958
30	0.145736	0.143858
31	0.136482	0.13472
32	0.128083	0.126425
33	0.120435	0.118873
34	0.113452	0.111978
35	0.10706	0.105665
36	0.101192	0.0998716
37	0.0957941	0.0945414
38	0.0908166	0.0896265
39	0.0862172	0.0850849
40	0.0819584	0.0808798
41	0.0780074	0.0769787
42	0.0743354	0.0733531
43	0.0709165	0.0699775
44	0.0677282	0.0668295
45	0.06475	0.0638891
46	0.0619641	0.0611384
47	0.059354	0.0585616
48	0.0569054	0.0561441
49	0.0546052	0.0538732
50	0.0524417	0.0517372

## Sheet: Fig.4(b)
	Talc	Graphite
Fill angle (deg)	FST (uN)	FST (uN)
1	0.355989	0.159367
2	0.710248	0.318544
3	1.06234	0.477338
4	1.41185	0.635555
5	1.75834	0.793003
6	2.1014	0.949491
7	2.44059	1.10483
8	2.77553	1.25882
9	3.10578	1.41129
10	3.43096	1.56205
11	3.75067	1.7109
12	4.06451	1.85768
13	4.37211	2.00221
14	4.67309	2.1443
15	4.96708	2.28379
16	5.25374	2.4205
17	5.5327	2.55427
18	5.80363	2.68493
19	6.0662	2.81233
20	6.32009	2.93631
21	6.56498	3.05673
22	6.8006	3.17343
23	7.02663	3.28626
24	7.24282	3.39511
25	7.4489	3.49982
26	7.64461	3.60029
27	7.82972	3.69637
28	8.004	3.78796
29	8.16725	3.87494
30	8.31925	3.95721
31	8.45984	4.03467
32	8.58883	4.10723
33	8.70607	4.17478
34	8.81142	4.23727
35	8.90474	4.2946
36	8.98593	4.3467
37	9.05488	4.39352
38	9.11152	4.435
39	9.15577	4.47108
40	9.18758	4.50173
41	9.20691	4.5269
42	9.21374	4.54657
43	9.20805	4.56071
44	9.18986	4.5693
45	9.15919	4.57233
46	9.11608	4.56981
47	9.06057	4.56172
48	8.99273	4.54809
49	8.91266	4.52893
50	8.82044	4.50426
51	8.71618	4.47411
52	8.60002	4.43852
53	8.4721	4.39753
54	8.33257	4.3512
55	8.1816	4.29957
56	8.01937	4.24272
57	7.84608	4.1807
58	7.66195	4.1136
59	7.4672	4.0415
60	7.26206	3.96449
61	7.04678	3.88265
62	6.82163	3.79609
63	6.58689	3.70492
64	6.34282	3.60924
65	6.08974	3.50918
66	5.82795	3.40484
67	5.55777	3.29637
68	5.27953	3.18389
69	4.99356	3.06754
70	4.70022	2.94746
71	4.39987	2.8238
72	4.09286	2.6967
73	3.77957	2.56633
74	3.46038	2.43283
75	3.13569	2.29639
76	2.80588	2.15715
77	2.47136	2.01529
78	2.13253	1.87098
79	1.78981	1.72439
80	1.44362	1.57572

## Sheet: Fig.8(a)
Receding contact angle (degrees)
Force (mN)	1	2	3	4	5
Before	136	140	132	135	130
0	146	132	135	146	142
1.18	104	98	108	72	108
2.36	84	63	49	48	61
3.54	56	67	64	48	45
4.72	54	50	47	50	47

## Sheet: Fig.8(b)
Advancing contact angle (degrees)
Force (mN)	1	2	3	4	5
Before	144	128	131	135	135
0	126	132	134	134	133
1.18	140	147	137	126	137
2.36	131	142	139	108	136
3.54	140	116	127	121	121
4.72	105	129	129	120	121

## Sheet: Fig.8(c)
Contact length (mm)
Force (mN)	1	2	3	4	5
Before	2	2.104	2.07	2.176	1.98
0	2.9	3	2.87	2.796	2.878
1.18	2.8075	2.6535	2.9195	2.7955	2.8
2.36	2.65896	2.72496	2.71	2.70096	2.76496
3.54	2.57	2.56038	2.38038	2.69238	2.66238
4.72	2.52026	2.52226	2.45426	2.67226	2.54
